# Supplementary material for: Identification of Vascular and Hematopoietic Genes Downstream of etsrp by Deep Sequencing in Zebrafish
Source: PLoS One. 2012 Mar 16;7(3):e31658. doi: 10.1371/journal.pone.0031658 (PMC3306315; doi:10.1371/journal.pone.0031658)
Supplement: Table S3 — Quantitative PCR of unigene hits predicted to be suppressed by etsrp oe via RNA-seq. (XLS) [file pone.0031658.s004.xls]

## Sheet: Sheet1
Table S3: quantitative PCR of unigene hits predicted to be suppressed by etsrp oe via RNA-seq.
Unigene ID	Gene ID	Gene Description	Average Fold-Change	Standard Deviation	Fold-Change by RNA-seq
Dr.133216	sox32*	SRY-box containing gene 32	0.38	0.24	0.51
Dr.81305	bon*	similar to bonnie and clyde	0.48	0.08	0.51
Dr.36017	myoD	myogenic differentiation 1	1.11	0.41	0.46
Dr.78792	nkx2.1b	nk2 homeobox 1b	1.38	0.74	0.43
Dr.117206	ctsl1b	similar to cathepsin L, 1 b	0.82	0.16	0.39
Dr.75761	rx1	retinal homeobox gene 1	0.61	0.37	0.24
Dr.152568	fez2d	FEZ family zinc finger 2d	0.78	0.44	0.09
Dr.81131	dpf3	D4, zinc and double PHD fingers, family 3	1.22	0.26	0.01
Dr.78408	fli1a*	friend leukemia integration 1a	53.08	30.92	37.6
* Statistically significant, determined by student t-test p<0.05. fli1a was included as a control.
